| Variable                 | Categories    | Before Matching |         |                          | After Matching |          |                          |
|--------------------------|---------------|-----------------|---------|--------------------------|----------------|----------|--------------------------|
|                          |               | Treated         | Control | Standard Mean Difference | Treated        | Control  | Standard Mean Difference |
| Education                | No Education  | 0.36128         | 0.22111 | 29.149                   | 0.36128        | 0.36128  | 0                        |
|                          | Primary       | 0.4491          | 0.39787 | 10.29                    | 0.4491         | 0.4491   | 0                        |
|                          | Secondary     | 0.18164         | 0.34775 | -43.041                  | 0.18164        | 0.18164  | 0                        |
| Residence                | Rural         | 0.39721         | 0.42889 | -6.4692                  | 0.39721        | 0.39721  | 0                        |
| Wealth Index             | Poorest       | 0.26347         | 0.18419 | 17.979                   | 0.26347        | 0.26347  | 0                        |
|                          | Poorer        | 0.25549         | 0.22561 | 6.8447                   | 0.25549        | 0.25549  | 0                        |
|                          | Richer        | 0.15968         | 0.20048 | -11.126                  | 0.15968        | 0.15968  | 0                        |
|                          | Richest       | 0.073852        | 0.17493 | -38.609                  | 0.073852       | 0.073852 | 0                        |
| Child Bearing Experience | No Experience | 0.21557         | 0.22294 | -1.7907                  | 0.21557        | 0.21557  | 0                        |
